# Supplementary material
Source: Elsevier journal article supplement (https://www.sciencedirect.com/science/article/pii/S0034935621002103)
Supplement: mmc1 [file S0034935621002103:mmc1.doc]

PAS: Presión arterial sistólica; SIR: Secuencia de intubación rápida d: diferencia de medias IC: Intervalo de confianza

**Figura (Material complementario).** Evaluación de la calidad metodológica de las investigaciones.
